# Supplementary material for: Impairments in action–outcome learning in schizophrenia
Source: PubMed Central journal article supplement (PMC5834614; doi:10.1038/s41398-018-0103-0), 2018-03-03
Supplement: 41398_2018_103_MOESM1_ESM.pdf [file 41398_2018_103_MOESM1_ESM.pdf]

## Supplementary Figure 1

### a. Contingency Learning

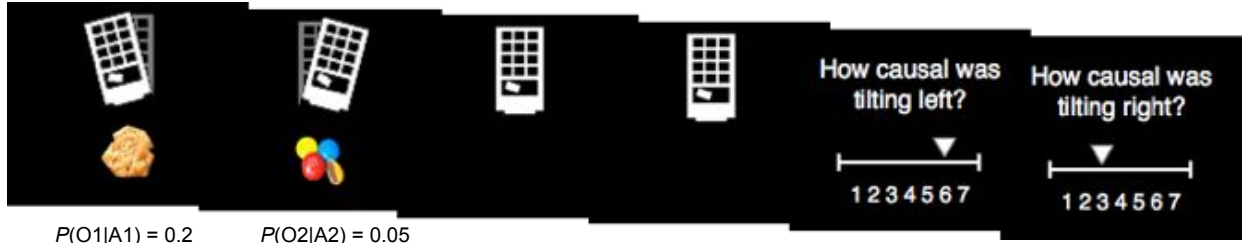

### b. Contingency degradation

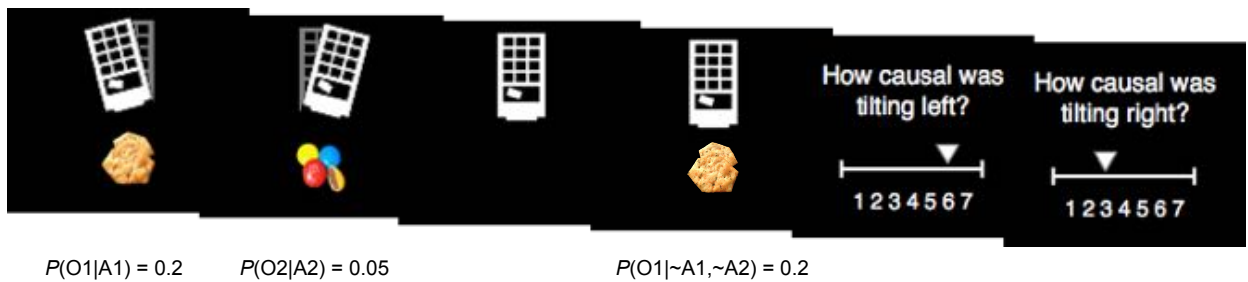

### c. Outcome devaluation

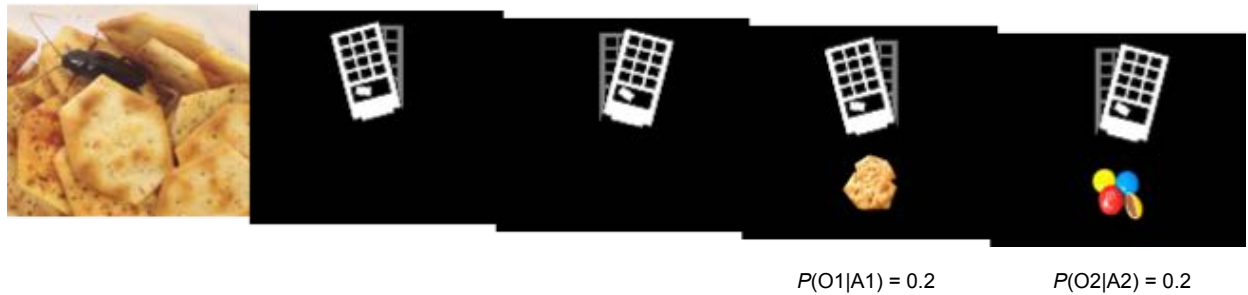

**Figure S1.** Stimulus screens in **a)** reward contingency learning **b)** contingency degradation and **c)** outcome devaluation tests. Tests were designed to exclude any discriminative cues that might indicate the best action, in order to minimize the influence of Pavlovian learning and emphasize action-outcome learning

## Supplementary figure 2. Degradation Results

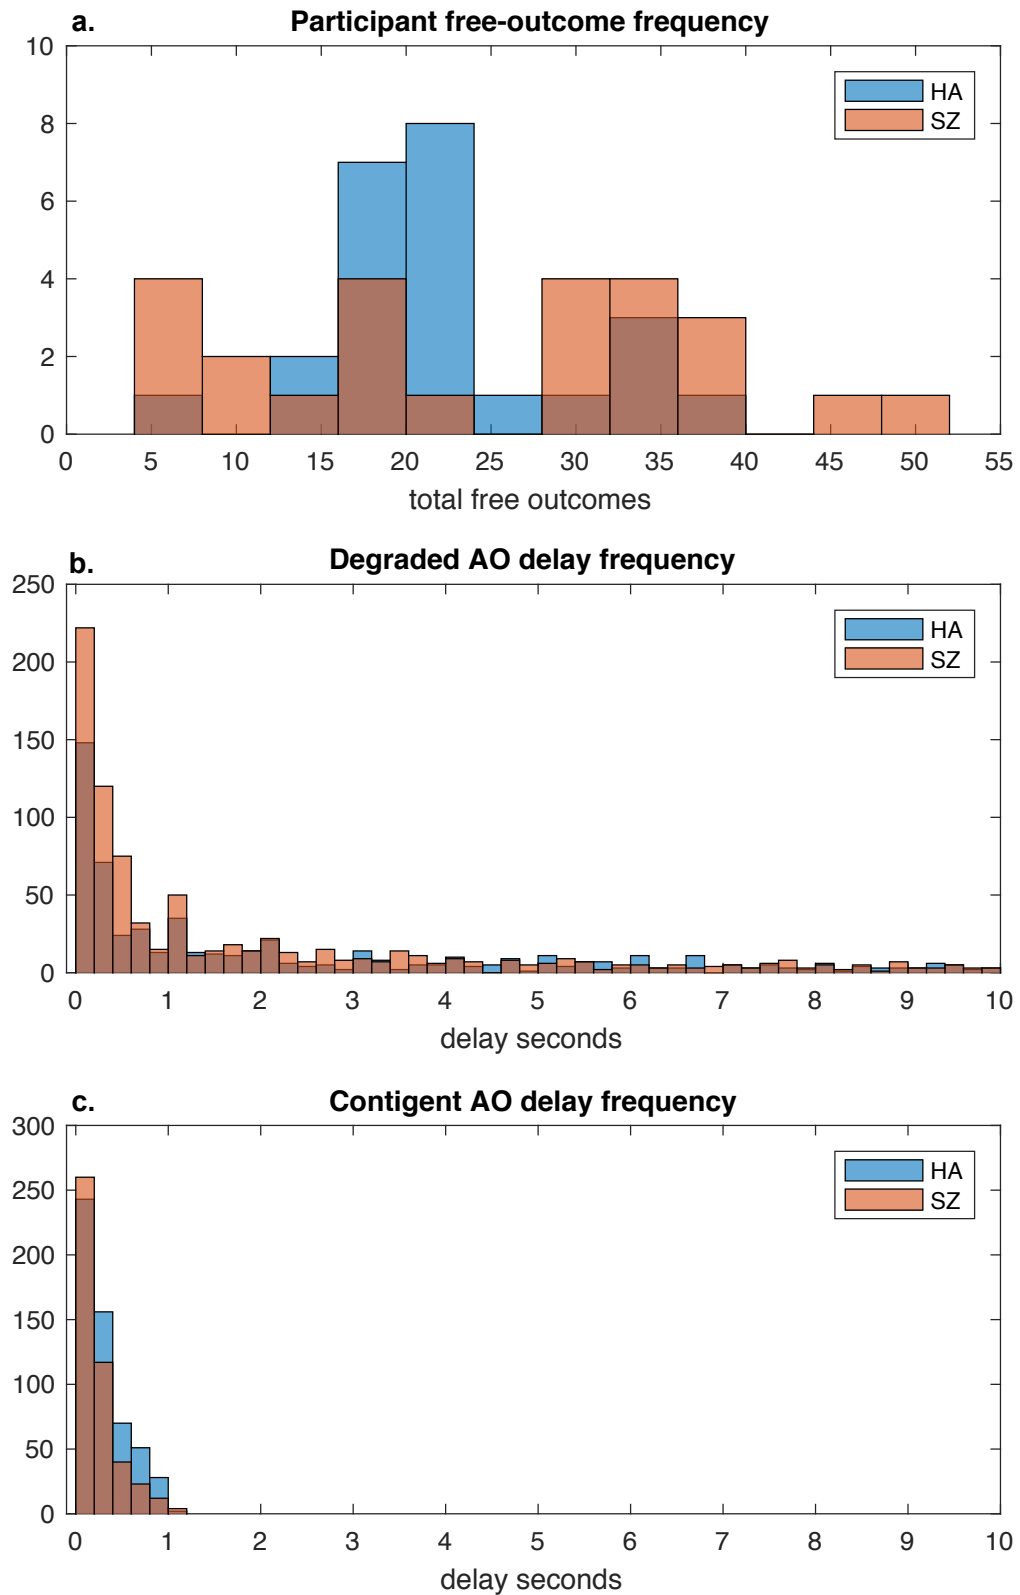

**Figure S2.** Degradation Results. **a)** Histograms of the total non-contingent (free) outcomes received by each participant were similar for both groups. **b)** Frequency distributions of the degraded action-outcome delays experienced by each group were similar for both groups, and **c)** the distributions of the contingent action-outcome delays experienced by each group were also similar

### Supplementary figure 3. Rating Results by Block

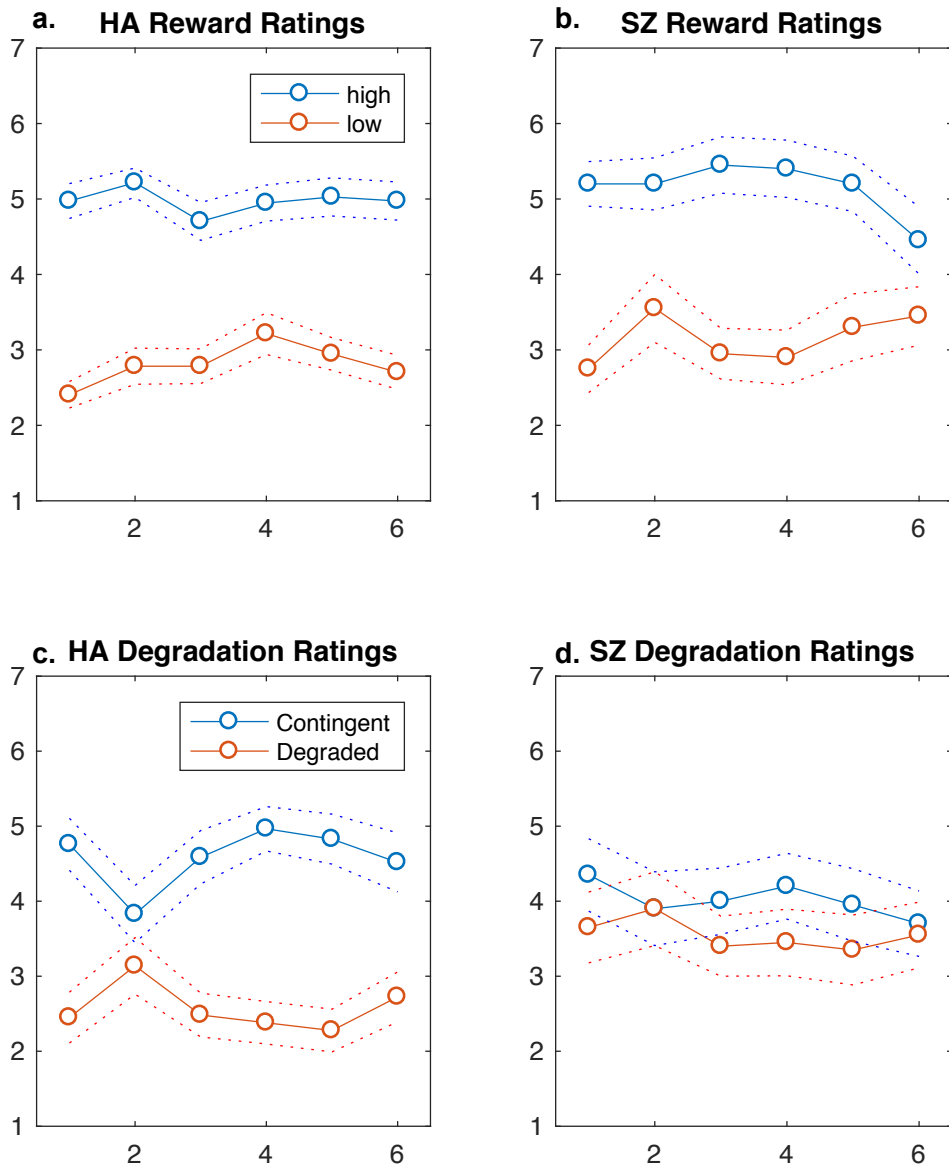

**Figure S3.** Mean ratings from the judgments at the end of each of the six blocks from **a)** Reward Contingency test in healthy adults **b)** and Reward Contingency test in people with schizophrenia **c)** Contingency Degradation test in healthy adults and **d)** Contingency Degradation test in people with schizophrenia
